# Supplementary material for: Biaxially stretchable supercapacitors based on the buckled hybrid fiber electrode array
Source: Royal Society of Chemistry journal article supplement (doi:10.1039/c5nr03027g), 2015-01-01
Supplement: c5nr03027g1.pdf [file c5nr03027g1.pdf]

SUPPLEMENTARY INFORMATION

## **Biaxially stretchable supercapacitors based on the buckled hybrid fiber electrode array**

Nan Zhang, Weiya Zhou,\* Qiang Zhang, Pingshan Luan, Le Cai, Feng Yang, Xiao Zhang, Qingxia Fan, Wenbin Zhou, Zhuojian Xiao, Xiaogang Gu, Huiliang Chen, Kewei Li, Shiqi Xiao, Yanchun Wang, Huaping Liu, Sishen Xie\*

*Beijing National Laboratory for Condensed Matter Physics, Institute of Physics, Chinese Academy of Sciences, Beijing 100190, China. E-mail: wyzhou@iphy.ac.cn, sxxie@iphy.ac.cn*

*Beijing Key Laboratory for Advanced Functional Materials and Structure Research, Beijing 100190, China.*

*University of Chinese Academy of Sciences, Beijing 100049, China*

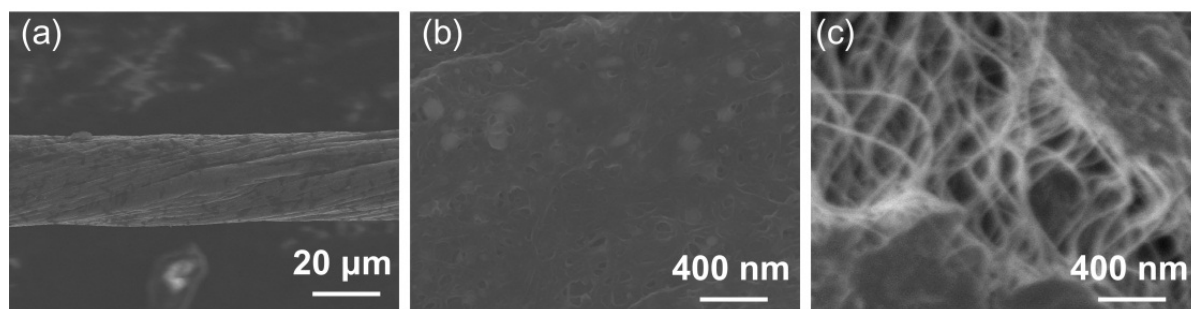

**Fig.S1** SEM images of (a) the twist-first hybrid fiber at low-magnification, (b) the surface and (c) the rip at high-magnification.

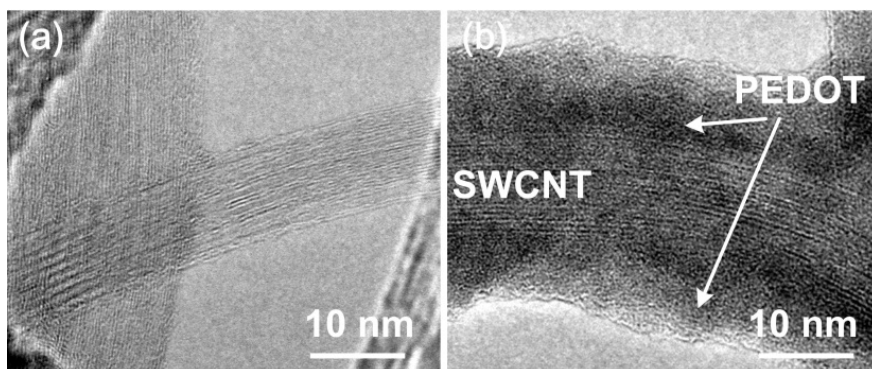

**Fig.S2** TEM images of (a) pure SWCNT bundles and (b) SWCNT/PEDOT hybrid bundles.

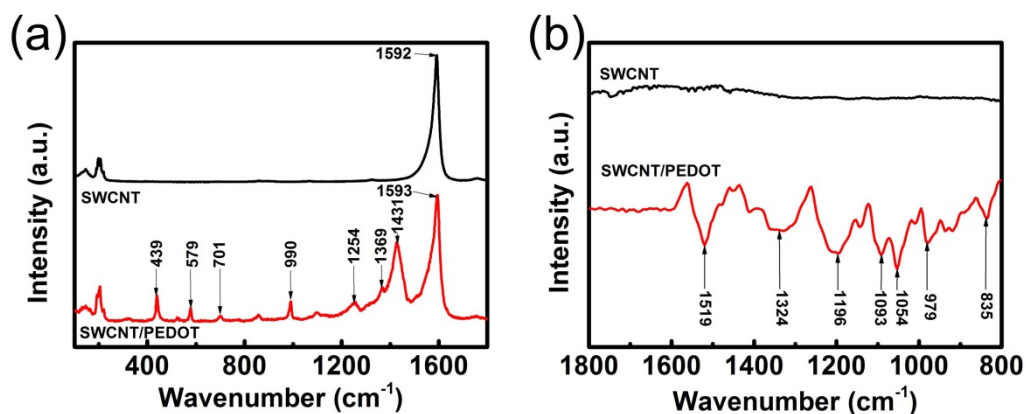

**Fig. S3** (a) The Raman spectra (633 nm) of the SWCNT fiber and SWCNT/PEDOT hybrid fiber. Peaks at about 1590  $\text{cm}^{-1}$  corresponding to G band of SWCNTs were normalized to 1. Peaks at about 439  $\text{cm}^{-1}$ , 579  $\text{cm}^{-1}$  and 990  $\text{cm}^{-1}$  were assigned to oxyethylene ring deformation. Peak at 701  $\text{cm}^{-1}$  was assigned to Symmetric C–S–C deformation. Peaks at about 1254  $\text{cm}^{-1}$  and 1369  $\text{cm}^{-1}$  were assigned to C–C stretching. Peak at about 1431  $\text{cm}^{-1}$  was assigned to Symmetric C-C (–O) stretching.<sup>1</sup> (b) FTIR spectra of the pure SWCNT film and SWCNT/PEDOT hybrid film. Peaks at 1519  $\text{cm}^{-1}$  and 1324  $\text{cm}^{-1}$  originated from the C-C or C=C stretching in the thiophene ring. Peaks at 1196  $\text{cm}^{-1}$ , 1093  $\text{cm}^{-1}$  and 1054  $\text{cm}^{-1}$  are assigned to stretching in the alkyleneedioxy group. Peaks at 979  $\text{cm}^{-1}$  and 835  $\text{cm}^{-1}$  are the C-S bond in the thiophene.<sup>2</sup>

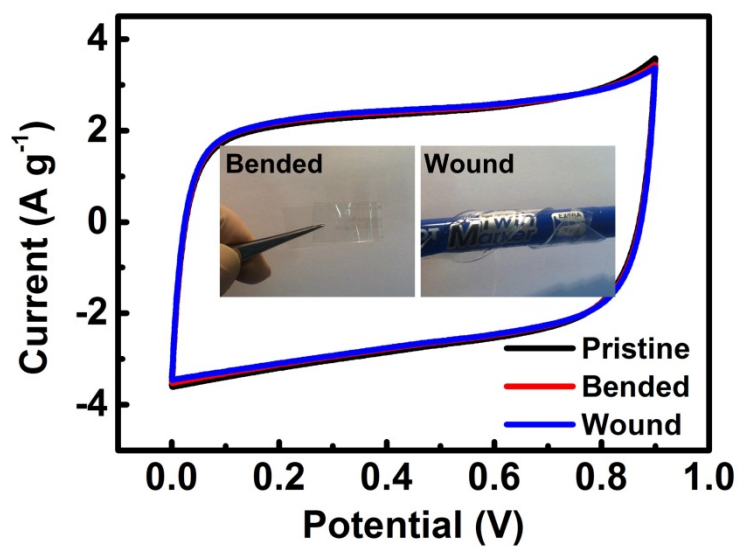

**Fig. S4** CVs of a supercapacitor while it was pristine, bended and wound at a sweep rate of  $50 \text{ mV s}^{-1}$ . Inset: optical images of the bended and wound supercapacitor.

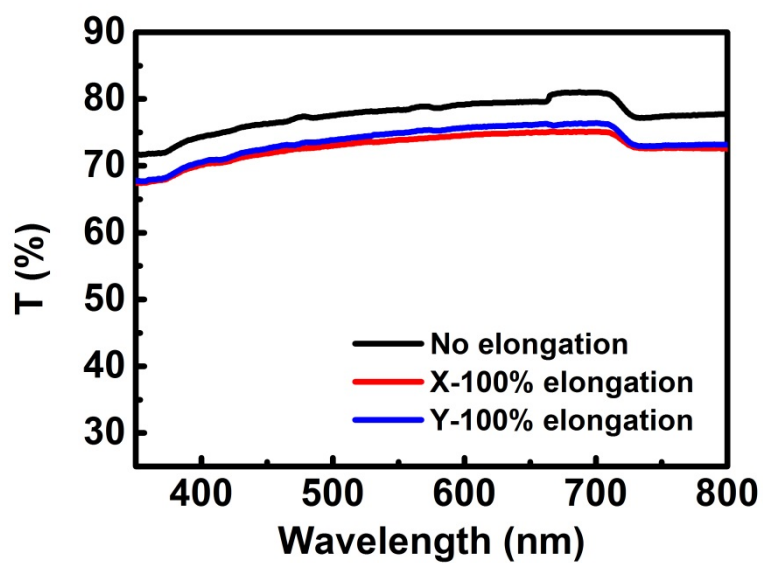

**Fig. S5** Transmittance spectra of a supercapacitor under no elongation, 100% elongation in X- and Y-direction.

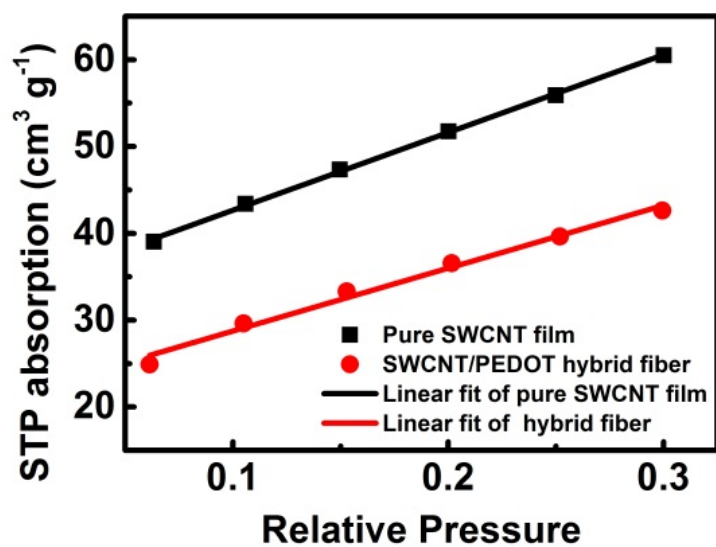

**Fig. S6** Multi-point BET plots of the as-prepared pure SWCNT film and optimized SWCNT/PEDOT hybrid fiber (electrodeposition-first fiber with 10 electrodepositing cycles). The specific surface area of the pure SWCNT film is  $190.3 \text{ m}^2 \text{ g}^{-1}$ , and the specific surface area of the hybrid fiber decreased to  $135.7 \text{ m}^2 \text{ g}^{-1}$  because of electrodeposition and twisting processes. The samples were tested by Quadrasorb SI-MP system (Quantachrome, USA) and the analysis gas is Nitrogen. Note: STP denotes standard temperature and pressure.

- 1 W. W. Chiu, J. Travaš-Sejdić, R. P. Cooney and G. A. Bowmaker, *Journal of Raman Spectroscopy*, 2006, **37**, 1354-1361.
- 2 C. Kvarnström, H. Neugebauer, S. Blomquist, H. J. Ahonen, J. Kankare and A. Ivaska, *Electrochim. Acta*, 1999, **44**, 2739-2750.
